# Supplementary material for: Structural and thermodynamic characterization of allosteric transitions in human serum albumin with metadynamics simulations
Source: Royal Society of Chemistry journal article supplement (doi:10.1039/d3cp04169g), 2024-01-01
Supplement: d3cp04169g1.pdf [file d3cp04169g1.pdf]

## SUPPLEMENTARY INFORMATION

# Structural and thermodynamic characterization of the allosteric transitions in human serum albumin with meta dynamics simulations

Thales Souza Freire, Julio Zukerman-Schpector, Ran Friedman, Iñez Caracelli

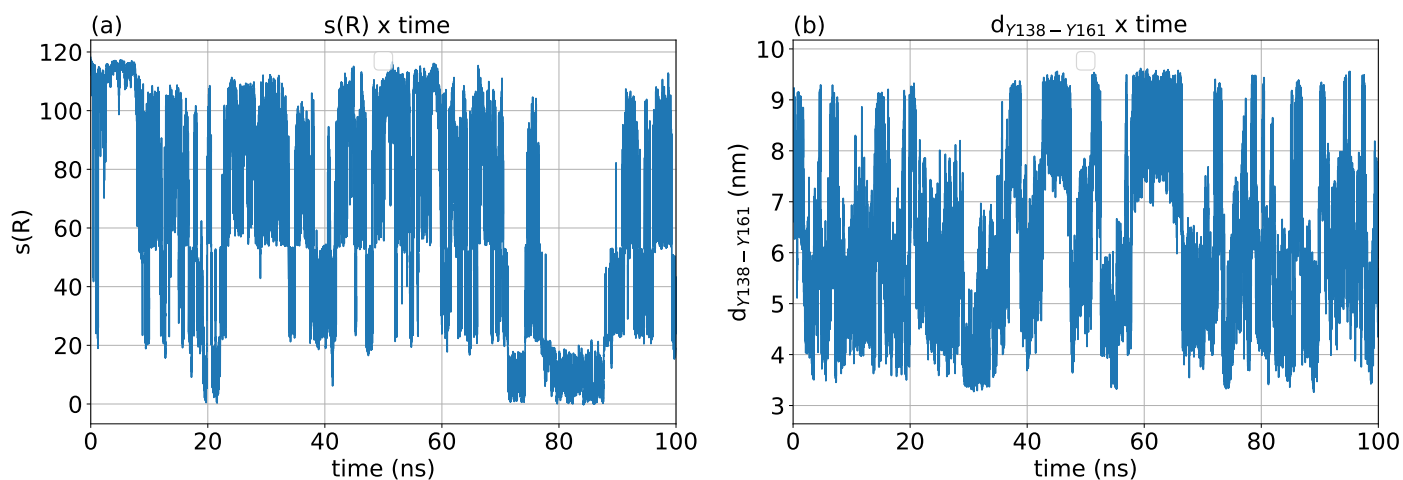

**Figure 1** Time series of path CV (a)  $s(R)$  combined with (b)  $d_{\gamma_{138}-\gamma_{161}}$ . Wt-metad simulation were started at B state, near  $s(R) = 120$  and  $d_{\gamma_{138}-\gamma_{161}} = 8.4$  nm, and explored the whole CVs space, recrossing the main barrier several times.

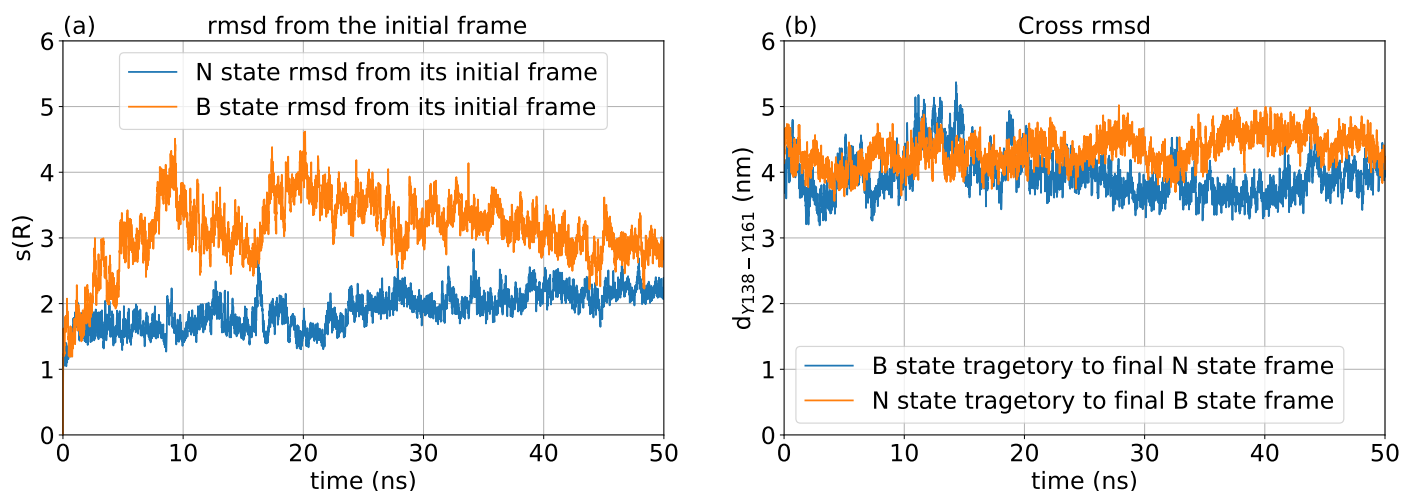

**Figure 2** Time series of rmsd for the non-biased MD production stage, prior to wt-metad simulation (a) relative to its initial frame, showing the stabilization of each state used for wt-metad, and (b) the final frame of each trajectory compared to the other, showing that the structure remained far from each other through the whole MD, and were therefore stable at the respective N and B states.
